# Supplementary material
Source: PubMed Central journal article supplement (PMC3357998)
Supplement: cr201199x1.pdf [file cr201199x1.pdf]

Supplementary Figures

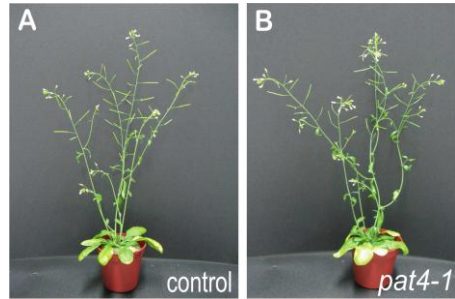

**Supplementary Figure S1** Plant morphology of *pat4* mutants

(**A, B**) *pat4-1* mutant does not show any morphological phenotype compared to the PIN1-GFP control plant.
