# Supplementary material
Source: PubMed Central journal article supplement (PMC3357998)
Supplement: cr201199x2.pdf [file cr201199x2.pdf]

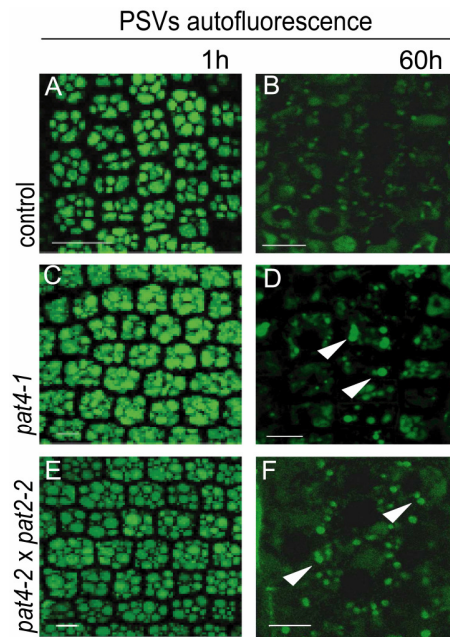

**Supplementary Figure S2** Maturation of lytic vacuoles in *pat4-1* and *pat2* mutants.

(A-F) PSVs morphology in the dry seeds of control (A), *pat4-1* (C) and double mutant *pat4-2* × *pat2-2* (E). (B, D, F) Degradation of storage proteins and maturation of lytic vacuoles after 60 hours of seeds imbibition. Note abnormal maturation of lytic vacuoles in *pat4-1* (D, arrowhead) and double mutant *pat4-2* × *pat2-2* (F, arrowhead) show regions of protein autofluorescence. Scale bar =10 μm.
