# Supplementary material
Source: PubMed Central journal article supplement (PMC3357998)
Supplement: cr201199x4.pdf [file cr201199x4.pdf]

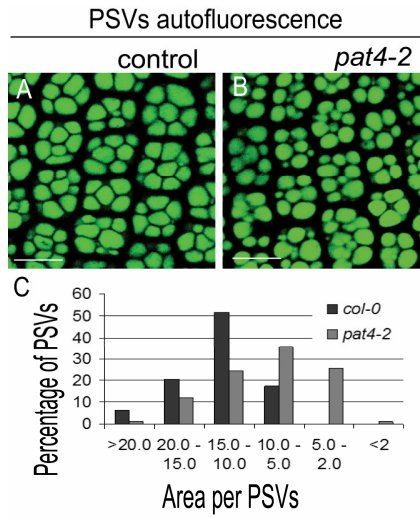

**Supplementary Figure S4** Morphology of PSVs in *pat4-2* mutant.

(**A-B**) PSV in embryo root cells of control (**A**) and *pat4-2* (**B**). (**C**) Quantification of the PSVs morphology. *pat4-2* mutant (gray bar) show smaller PSVs compared to wild-type seeds (black bar). Scale bar =10  $\mu$ m.
